# Supplementary material for: The health status of transgender and gender nonbinary adults in the United States
Source: PubMed Central journal article supplement (PMC7034836; doi:10.1371/journal.pone.0228765), 2020-02-21
Supplement: pone.0228765.s001.pdf [file pone.0228765.s001.pdf]

**The health status of transgender and gender nonbinary adults in the United States**Ethan C. Cicero<sup>1\*</sup>, Sari L. Reisner<sup>2-5</sup>, Elizabeth I. Merwin<sup>6, 7, #a</sup>, Janice C. Humphreys<sup>6</sup>, Susan G. Silva<sup>6,8</sup>**S1 Table. Significant Bivariate Model Results: *A Posteriori* Contrasts for Study Group, Individual Factors, Seasonality, and Health Status Outcomes.**

| Pairwise contrasts             |               |               |                  |
|--------------------------------|---------------|---------------|------------------|
| Factor                         | TW/TM         | TW/GNB        | TM/GNB           |
| <i>Personal characteristic</i> |               |               |                  |
| Sexual minority                |               |               |                  |
| <i>P</i> value                 | <b>0.0444</b> | <b>0.0046</b> | <b>&lt;0.001</b> |
| OR                             | 1.49          | 0.57          | 0.38             |
| 95% CI                         | 1.01, 2.21    | 0.38, 0.84    | 0.24, 0.59       |
| <i>Socioeconomic position</i>  |               |               |                  |
| Uninsured                      |               |               |                  |
| <i>P</i> value                 | <b>0.0106</b> | 0.0733        | 0.7214           |
| OR                             | 0.54          | 0.59          | 1.11             |
| 95% CI                         | 0.33, 0.86    | 0.34, 1.05    | 0.63, 1.96       |
| <i>Health status outcome</i>   |               |               |                  |
| Fair/poor health               |               |               |                  |
| <i>P</i> value                 | 0.4891        | <b>0.0245</b> | <b>0.0081</b>    |
| OR                             | 1.14          | 0.64          | 0.56             |
| 95% CI                         | 0.78, 1.67    | 0.44, 0.94    | 0.37, 0.86       |

Bold indicates statistical significance at the 0.05 level. CI: confidence interval;

GNB: gender nonbinary adults; OR: odds ratio; TM: transgender men; TW: transgender women.

\* Corresponding author. E-mail: [ethan.cicero@ucsf.edu](mailto:ethan.cicero@ucsf.edu); <sup>1</sup> Department of Community Health Systems, University of California San Francisco School of Nursing, San Francisco, California; <sup>2</sup> Department of Epidemiology, Harvard T.H. Chan School of Public Health, Boston, Massachusetts; <sup>3</sup> Department of Pediatrics, Harvard Medical School, Boston, Massachusetts; <sup>4</sup> Division of General Pediatrics, Boston Children's Hospital, Boston, Massachusetts; <sup>5</sup> The Fenway Institute, Fenway Health, Boston, Massachusetts; <sup>6</sup> School of Nursing, Duke University, Durham, North Carolina; <sup>7</sup> College of Nursing and Health Innovation, The University of Texas at Arlington, Arlington, Texas; <sup>#a</sup> College of Nursing and Health Innovation, The University of Texas at Arlington, Arlington, Texas; <sup>8</sup> School of Medicine, Duke University, Durham, North Carolina
