# Supplementary material for: The health status of transgender and gender nonbinary adults in the United States
Source: PubMed Central journal article supplement (PMC7034836; doi:10.1371/journal.pone.0228765), 2020-02-21
Supplement: pone.0228765.s002.pdf [file pone.0228765.s002.pdf]

**The health status of transgender and gender nonbinary adults in the United States**Ethan C. Cicero<sup>1\*</sup>, Sari L. Reisner<sup>2-5</sup>, Elizabeth I. Merwin<sup>6,7,#a</sup>, Janice C. Humphreys<sup>6</sup>, Susan G. Silva<sup>6,8</sup>**S2 Table. Final Multivariable Model Results: Significant Study Group Interaction for Fair/Poor Health Outcome.**

| Health status outcome | SG  | Uninsured |      | Insured |      |
|-----------------------|-----|-----------|------|---------|------|
|                       |     | Mean      | SEM  | Mean    | SEM  |
| Fair/poor health      | TW  | 0.07      | 0.04 | 0.23    | 0.03 |
|                       | TM  | 0.34      | 0.09 | 0.18    | 0.03 |
|                       | GNB | 0.23      | 0.11 | 0.31    | 0.04 |

Least squares means and SEM for estimated probabilities, adjusted for covariates in final multivariate model. GNB: gender nonbinary adults; TM: transgender men; TW: transgender women; SEM: standard error of the mean; SG: study group.

\* Corresponding author. E-mail: [ethan.cicero@ucsf.edu](mailto:ethan.cicero@ucsf.edu); <sup>1</sup> Department of Community Health Systems, University of California San Francisco School of Nursing, San Francisco, California; <sup>2</sup> Department of Epidemiology, Harvard T.H. Chan School of Public Health, Boston, Massachusetts; <sup>3</sup> Department of Pediatrics, Harvard Medical School, Boston, Massachusetts; <sup>4</sup> Division of General Pediatrics, Boston Children's Hospital, Boston, Massachusetts; <sup>5</sup> The Fenway Institute, Fenway Health, Boston, Massachusetts; <sup>6</sup> School of Nursing, Duke University, Durham, North Carolina; <sup>7</sup> College of Nursing and Health Innovation, The University of Texas at Arlington, Arlington, Texas; <sup>#a</sup> College of Nursing and Health Innovation, The University of Texas at Arlington, Arlington, Texas; <sup>8</sup> School of Medicine, Duke University, Durham, North Carolina
